# Supplementary material
Source: publisher figshare collection journal article supplement (https://tandf.figshare.com/ndownloader/files/16636439)

**Figure S1**


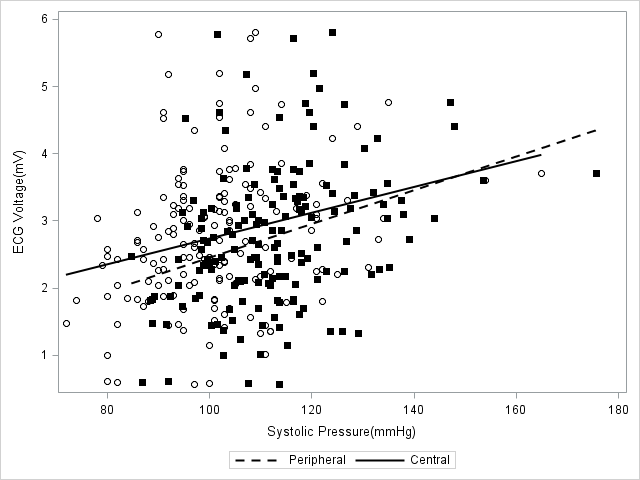


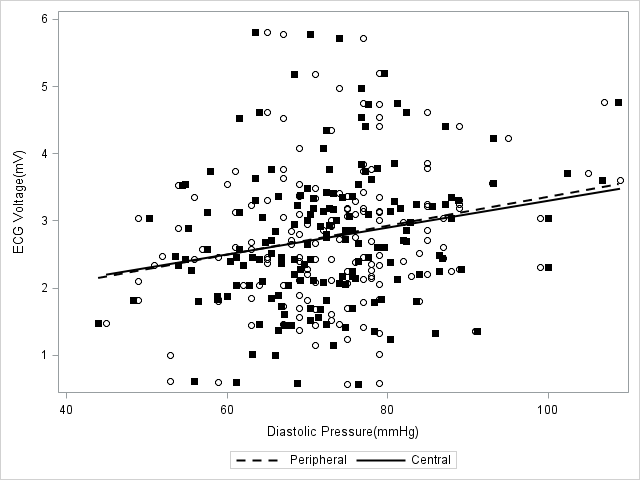


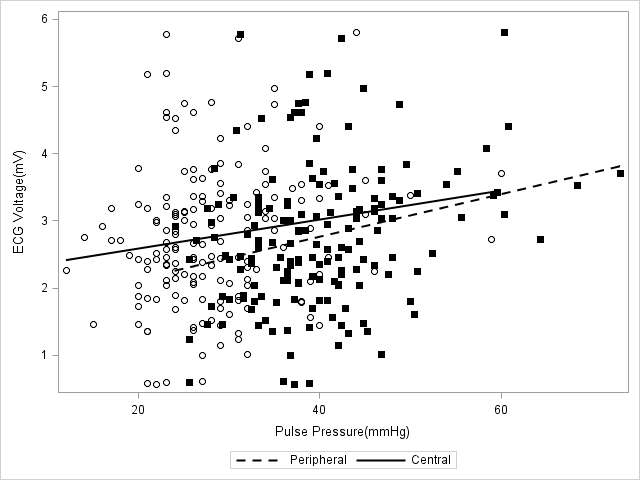


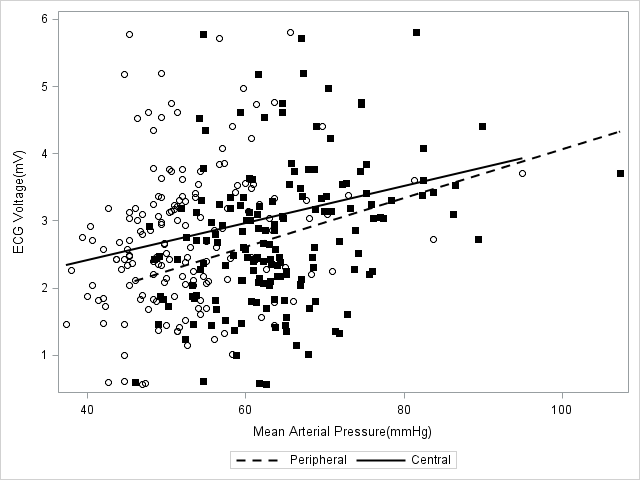

Supplement: Supplementary file 1 [file 16636439]
